# Supplementary material
Source: HighWire-hosted journal article supplement (https://erj.ersjournals.com/content/54/6/1901922)
Supplement: inline-supplementary-material-1 [file inline-supplementary-material-1.pdf]

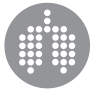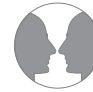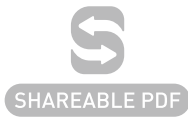

# Giant cell interstitial pneumonia secondary to cobalt exposure from e-cigarette use

Daffolyn Rachael Fels Elliott <sup>1</sup>, Rupal Shah<sup>2</sup>, Catherine Ann Hess<sup>3,4</sup>, Brett Elicker<sup>5</sup>, Travis S. Henry<sup>5</sup>, Ana Maria Rule <sup>4</sup>, Rui Chen<sup>4</sup>, Mehdi Golozar<sup>6</sup> and Kirk D. Jones<sup>1</sup>

**Affiliations:** <sup>1</sup>Dept of Pathology, University of California San Francisco, San Francisco, CA, USA. <sup>2</sup>Dept of Medicine, University of California San Francisco, San Francisco, CA, USA. <sup>3</sup>School of Public Health Prevention Research Center, University of California Berkeley, Berkeley, CA, USA. <sup>4</sup>Dept of Environmental Health Sciences, Johns Hopkins Bloomberg School of Public Health, Baltimore, MD, USA. <sup>5</sup>Dept of Radiology, University of California San Francisco, San Francisco, CA, USA. <sup>6</sup>Dept of Engineering, University of Cambridge, Cambridge, UK.

**Correspondence:** Kirk D. Jones, Dept of Pathology, University of California San Francisco, 505 Parnassus Ave, Room M-545, San Francisco, CA 94143, USA. E-mail: kirk.jones@ucsf.edu

 @ERSpublications

**An e-cigarette user developed giant cell interstitial pneumonia, a rare disease largely limited to work exposure to hard metals, including cobalt. Analysis of the e-liquid identified significant levels of cobalt, supporting the e-cigarette's causative role.** <http://bit.ly/2VRcT1U>

**Cite this article as:** Fels Elliott DR, Shah R, Hess CA, *et al.* Giant cell interstitial pneumonia secondary to cobalt exposure from e-cigarette use. *Eur Respir J* 2019; 54: 1901922 [<https://doi.org/10.1183/13993003.01922-2019>].

This single-page version can be shared freely online.

*To the Editor:*

The spectrum of pulmonary disease caused by e-cigarette use is currently emerging and appears to be multifaceted [1]. We describe a patient who developed pathologically documented giant cell interstitial pneumonia following regular use of an e-cigarette. This disorder has been termed hard metal pneumoconiosis, or cobalt lung, due to its close association with exposure to hard metal (cemented tungsten carbide with cobalt) [2]. Analysis of the device's e-liquid revealed significant levels of cobalt, supporting a diagnosis of giant cell interstitial pneumonia associated with inhaled cobalt from regular e-cigarette use.
